# Supplementary material
Source: PubMed Central journal article supplement (PMC3366001)

## **Supplemental data**

### **The FKBP38 catalytic domain binds to Bcl-2 via a charge-sensitive loop**

*Katja Haupt, Günther Jahreis, Miriam Linnert, Mitchell Maestre-Martínez, Miroslav Malešević, Arndt Pechstein, Frank Edlich, and Christian Lücke*

Table S1:  $^1\text{H}$ ,  $^{13}\text{C}$  and  $^{15}\text{N}$  resonance assignment of the Bcl-2<sup>119-131</sup> peptide at pH 7.5 and 10 °C.

| residue                 | N     | HN        | H $\alpha$ | H $\beta$ | other H                                        | C $\alpha$ | C $\beta$ | other C                                           |
|-------------------------|-------|-----------|------------|-----------|------------------------------------------------|------------|-----------|---------------------------------------------------|
| Leu119                  |       |           | 3.71       | 1.54/1.51 | 1.55 $\gamma$ ; 0.91/0.90 $\delta$             | 55.2       | 44.4      | 26.8 $\gamma$ ; 24.8/24.1 $\delta$                |
| His120                  |       |           | 4.69       | 3.08/3.02 | 6.96 $\delta$ 2; 7.71 $\epsilon$ 1             | 56.3       | 31.3      | 119.6 $\delta$ 2; 138.8 $\epsilon$ 1              |
| Leu121                  | 125.1 | 8.48      | 4.42       | 1.63/1.54 | 1.55 $\gamma$ ; 0.93/0.86 $\delta$             | 54.9       | 42.5      | 26.8 $\gamma$ ; 24.8/23.4 $\delta$                |
| Thr122                  |       |           | 4.60       | 4.20      | 1.24 $\gamma$ 2                                | 59.7       | 69.7      | 21.4 $\gamma$ 2                                   |
| Pro123 ( <i>trans</i> ) |       |           | 4.37       | 2.24/1.76 | 1.95 $\gamma$ ; 3.68/3.83 $\delta$             | 63.4       | 32.1      |                                                   |
| Phe124                  | 120.7 | 8.42      | 4.61       | 3.10      | 7.25 $\delta$ ; 7.34 $\epsilon$ ; 7.30 $\zeta$ | 58.2       | 39.5      | 131.8 $\delta$ ; 131.5 $\epsilon$ ; 129.9 $\zeta$ |
| Thr125                  |       | 8.01      | 4.24       | 4.14      | 1.18 $\gamma$ 2                                | 67.7       | 70.1      | 21.6 $\gamma$ 2                                   |
| Ala126                  | 126.9 | 8.36      | 4.25       | 1.41      |                                                | 52.6       | 19.1      |                                                   |
| Arg127                  | 120.3 | 8.36      | 4.31       | 1.87/1.78 | 1.67/1.64 $\gamma$ ; 3.19 $\delta$             | 56.3       | 30.8      | 27.1 $\gamma$ ; 43.3 $\delta$                     |
| Gly128                  | 110.1 | 8.47      | 3.93       |           |                                                | 45.2       |           |                                                   |
| Arg129                  | 120.9 | 8.26      | 4.23       | 1.66      | 1.42 $\gamma$ ; 3.11 $\delta$                  | 56.4       | 30.7      | 26.9 $\gamma$ ; 43.3 $\delta$                     |
| Phe130                  | 121.7 | 8.44      | 4.65       | 3.18/3.04 | 7.27 $\delta$ ; 7.35 $\epsilon$ ; 7.30 $\zeta$ | 57.5       | 39.5      | 131.9 $\delta$ ; 131.5 $\epsilon$ ; 129.9 $\zeta$ |
| Ala131                  | 127.4 | 8.30      | 4.23       | 1.35      |                                                | 52.4       | 19.4      |                                                   |
| NH <sub>2</sub>         |       | 7.08/7.02 |            |           |                                                |            |           |                                                   |

Figure S1: FKBP38 binding to matrix-bound Bcl-2 peptides. The peptides corresponding to Bcl-2 segments 20-34, 87-102, 167-181, 185-200, 195-210 and 119-131 were loaded onto a streptavidin matrix via biotin labels. The matrix was incubated with *E. coli* lysate containing FKBP38 (50  $\mu$ g total protein) with CaM/Ca<sup>2+</sup> (10  $\mu$ M) in the absence and presence of Bcl-2<sup>1-211</sup> (5  $\mu$ M). Input and matrix-bound fractions were subsequently analyzed by Western blotting using polyclonal rabbit anti-FKBP38 antibodies. Specific binding of peptide Bcl-2<sup>119-131</sup> is shown by the competition between soluble Bcl-2 and matrix-bound peptide.

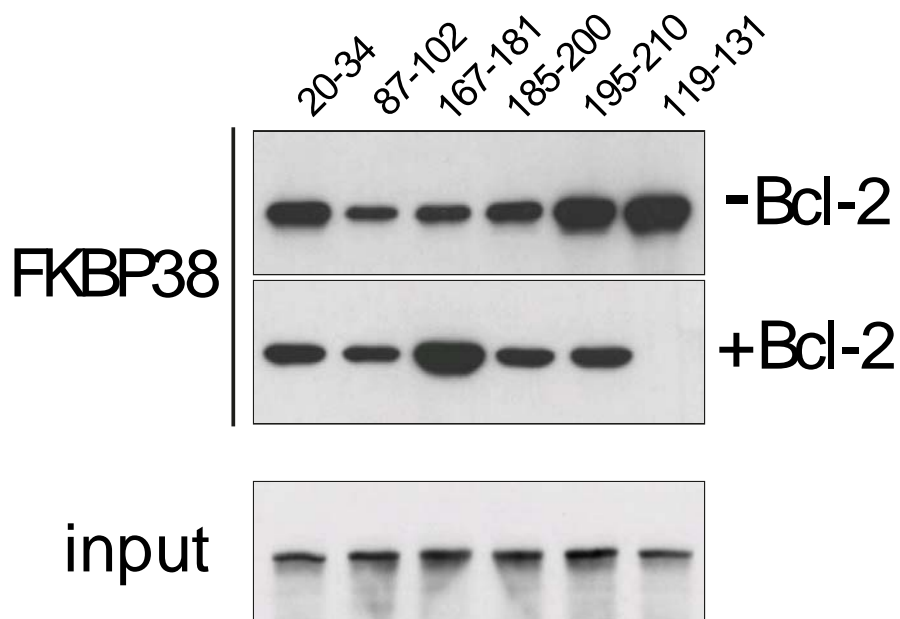

Figure S2: Reverse competition assay. Maltose beads loaded with a maltose binding protein/Bcl-2 fusion protein (MBP/Bcl-2) were incubated with FKBP38 (5  $\mu$ M) and CaM/Ca<sup>2+</sup> (10  $\mu$ M). Competition to the interaction between FKBP38 and Bcl-2<sup>1-211</sup> was tested by addition of the peptides Bcl-2<sup>51-80</sup> (i.e., the core region of the long flexible Bcl-2 loop) and Bcl-2<sup>119-131</sup> (i.e., the specific FKBP38-binding epitope), with subsequent analysis by Western blotting using polyclonal rabbit anti-FKBP38 antibodies. Only the peptide Bcl-2<sup>119-131</sup> released FKBP38 from the Bcl-2 loaded matrix. (Empty beads served as control.)

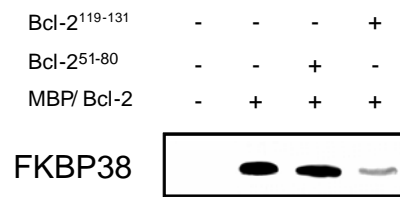

Figure S3: FKBP38 binding to Bcl-2<sup>119-131</sup>. The peptide Bcl-2<sup>119-131</sup> was loaded onto a streptavidin matrix via a biotin label. The matrix was incubated with FKBP38 (5 μM) in absence and presence of CaM/Ca<sup>2+</sup> (10 μM) and matrix-bound fractions were subsequently analyzed by Western blotting using polyclonal rabbit anti-FKBP38 antibodies. Specific binding of Bcl-2<sup>119-131</sup> is shown by the competition between soluble and matrix-bound peptide. On the other hand, the peptide Bcl-2<sup>51-80</sup>, corresponding to the core region of the flexible Bcl-2 loop, did not compete with the matrix-bound peptide Bcl-2<sup>119-131</sup> for binding of FKBP38. Involvement of the putative FKBP38 active site is indicated by a FK506-induced inhibition of the FKBP38/Bcl-2<sup>119-131</sup> interaction. (Unloaded matrix served as control.)

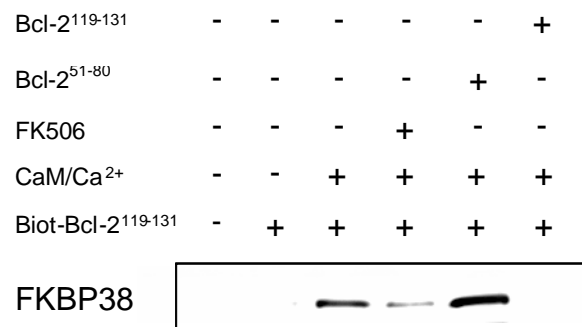

Figure S4: Isothermal titration calorimetry data of FKBP38/CaM/Ca<sup>2+</sup> titrated with Bcl-2<sup>119-131</sup>. The experiment was performed at 25 °C using a MicroCal VP-ITC microcalorimeter. FKBP38/CaM/Ca<sup>2+</sup> (35 μM) was dialyzed in 10 mM MES buffer (pH 6.8, 100 mM NaCl, 0.05% NaN<sub>3</sub>, 2 mM CaCl<sub>2</sub>) and placed in the calorimeter cell. Bcl-2<sup>119-131</sup>, solubilized in the same MES buffer to 0.20 mM concentration, was loaded into the syringe injector. The titrations were carried out in 510 μl aliquots, with a 240 s delay between each injection. The calorimetric titration data were fitted using the Origin 5.0 program supplied with the instrument. The best fit of the titration curve was obtained with a one-binding-site model, revealing a 1:1 binding stoichiometry ( $n = 1.014 \pm 0.006$ ) and a binding affinity in the lower micromolar range ( $K_d = 3.17 \pm 0.37 \mu\text{M}$ ,  $\Delta H = -34.2 \text{ kJ/mol}$ ,  $-T\Delta S = -24.8 \text{ kJ/mol}$ ).

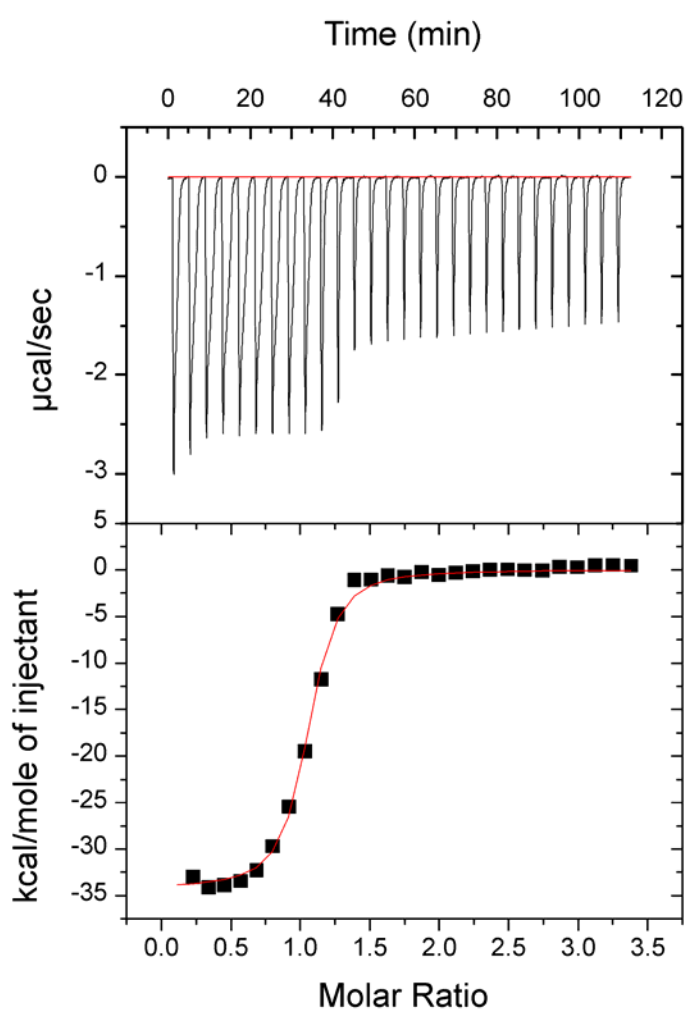

Figure S5: Overlay of  $^1\text{H}/^{15}\text{N}$ -HSQC spectra of FKBP38<sup>35-153</sup> in absence (red contours) and presence (blue contours) of the peptide Bcl-2<sup>119-131</sup>. CSP effects are most pronounced in the region of the  $\beta 5$ - $\alpha 1$  loop and also around K62, which had been shown previously to be affected by cation binding to the  $\beta 5$ - $\alpha 1$  loop (Maestre-Martínez et al. 2011, *J. Mol. Recognit.* **24**, 23-34).

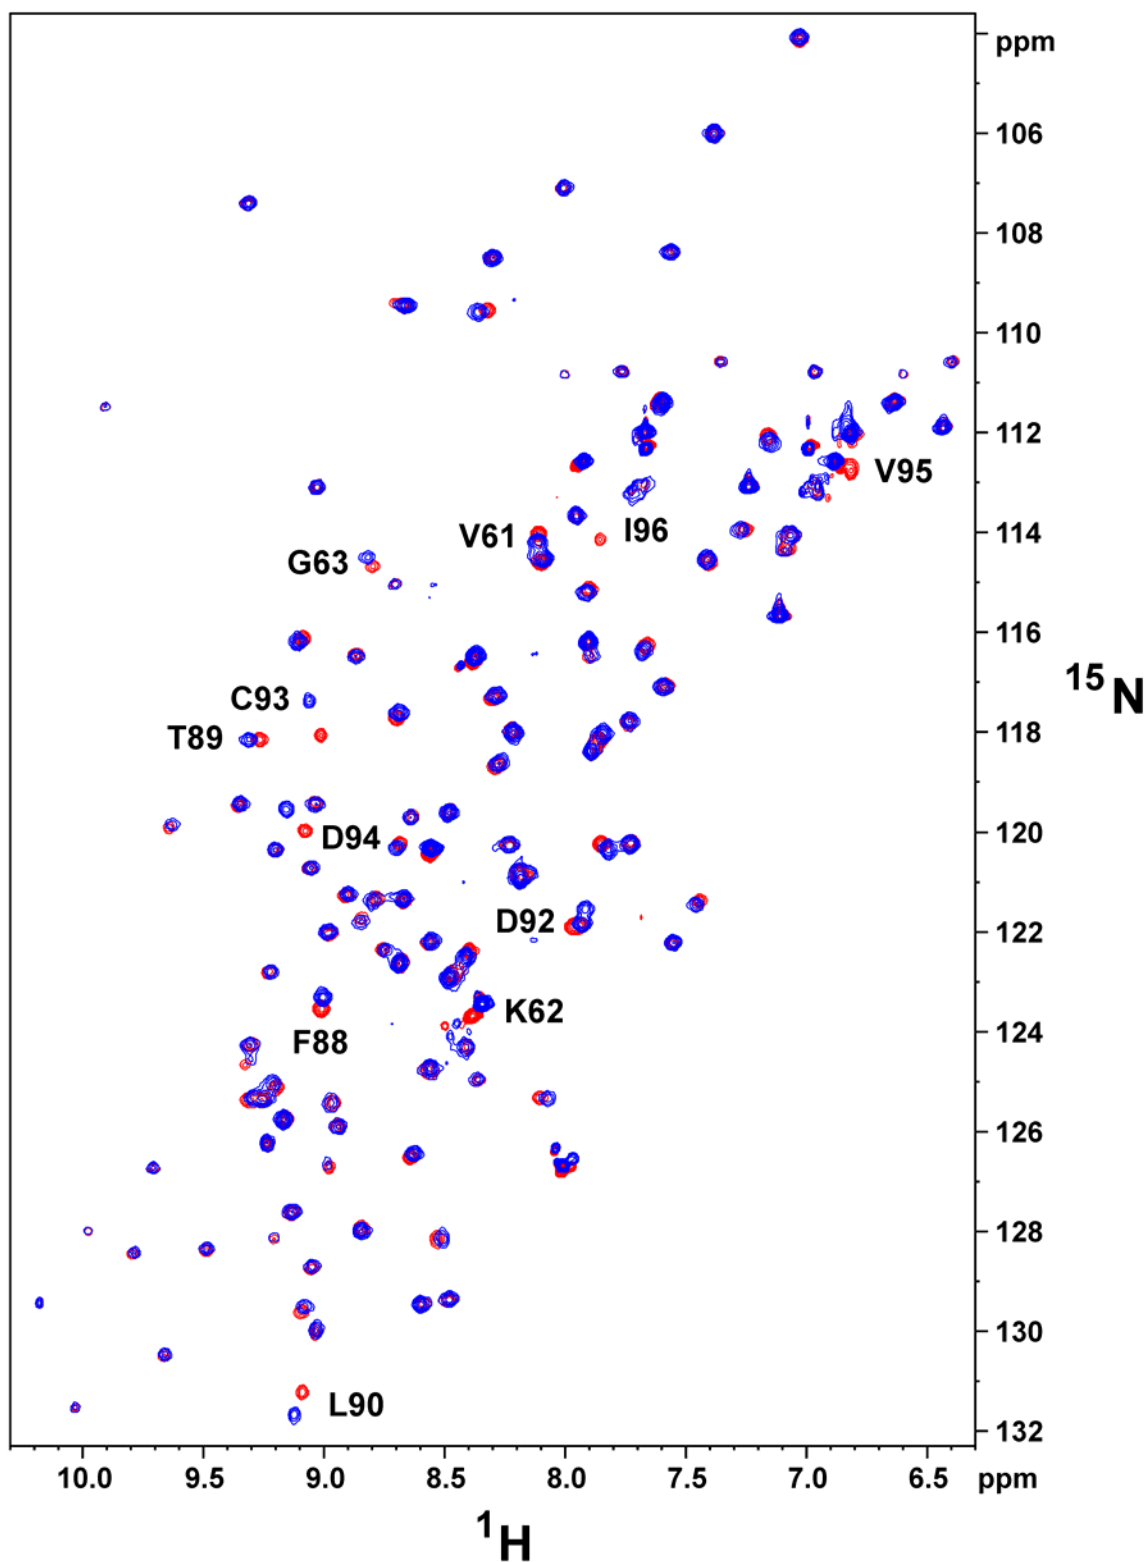

Figure S6: Section of the  $^1\text{H}/^{15}\text{N}$ -HSQC spectrum which includes the amide signals of residues T89, C93 and D94 in the  $\beta 5$ - $\alpha 1$  loop of FKBP38. Superposed are the spectra of FKBP38<sup>35-153</sup> in the absence of peptide Bcl-2<sup>119-131</sup> (black contours) as well as in presence of the peptides Bcl-2<sup>119-131</sup> R127Q/R129Q (blue contours), Bcl-2<sup>119-131</sup> R127Q (violet contours), Bcl-2<sup>119-131</sup> R129Q (magenta contours), and Bcl-2<sup>119-131</sup> (red contours).

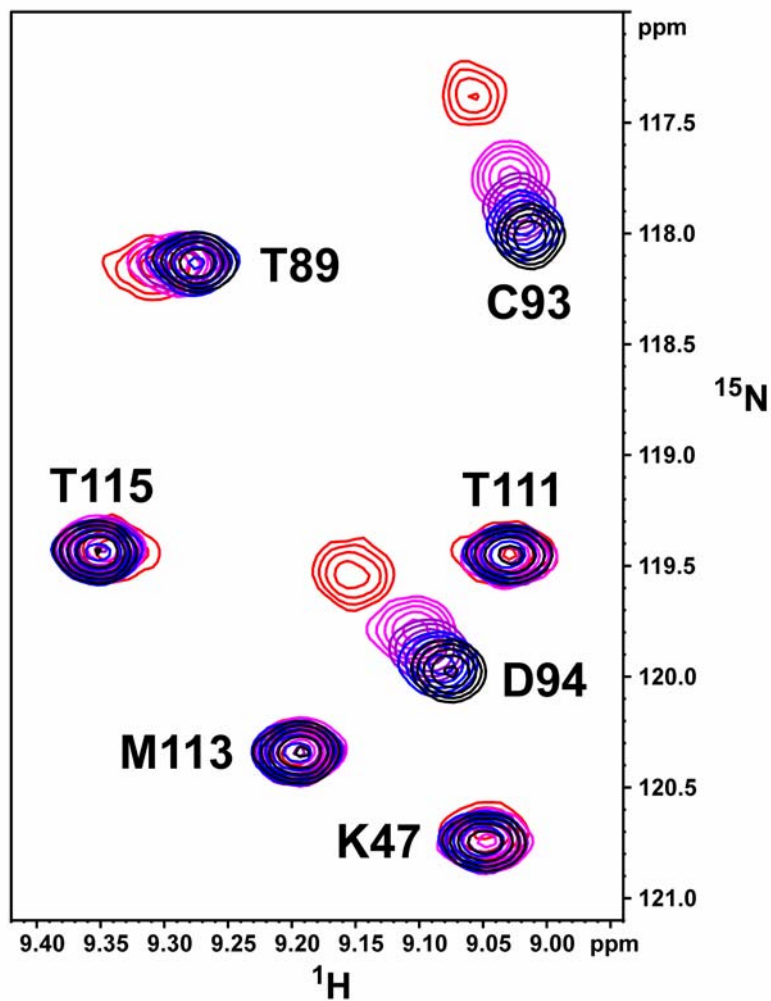



Figure S7: Overlay of  $^1\text{H}/^{15}\text{N}$ -HSQC spectra of the Bcl-2<sup>119-131</sup> peptide Npep1 in absence (black contours) and presence (red contours) of FKBP38<sup>35-153</sup>.

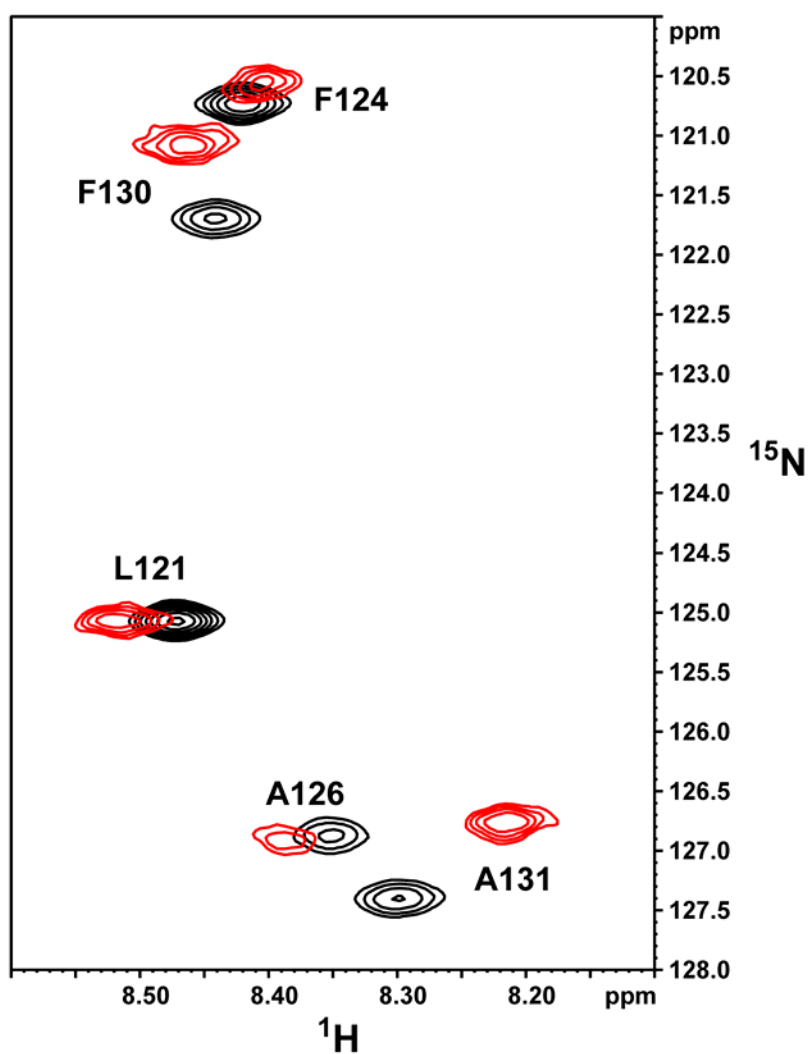

Figure S8:  $^1\text{H}/^{15}\text{N}$ -HSQC of Npep2 in absence (blue contours) and presence (red contours) of non-labelled FKBP38<sup>35-153</sup>. The side-chain  $\text{N}_\epsilon\text{H}$  signals of R127 and R129, which were not detected in absence of FKBP38<sup>35-153</sup>, became observable in the complex.

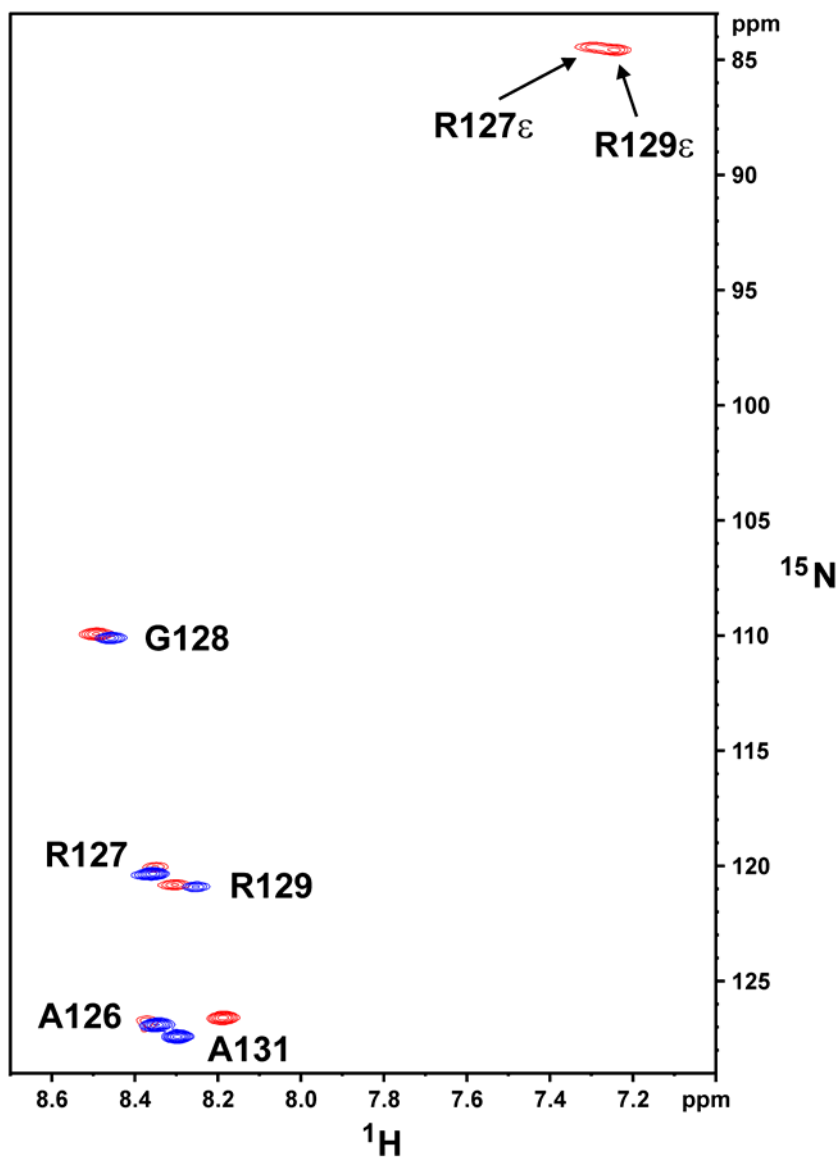

Figure S9: Overview of the chemical shift changes ( $\Delta\delta$ ) observed in  $^{15}\text{N}$ -labelled FKBP38<sup>35-153</sup> upon addition of a 3-fold molar excess of various Bcl2<sup>119-131</sup> peptide variants. CSP effects in the  $\beta 5$ - $\alpha 1$  loop region were observed with all peptide variants except Bcl2<sup>119-131</sup> R127Q/R129Q, corroborating the electrostatic character of the FKBP38<sup>35-153</sup>/Bcl2<sup>119-131</sup> interaction.

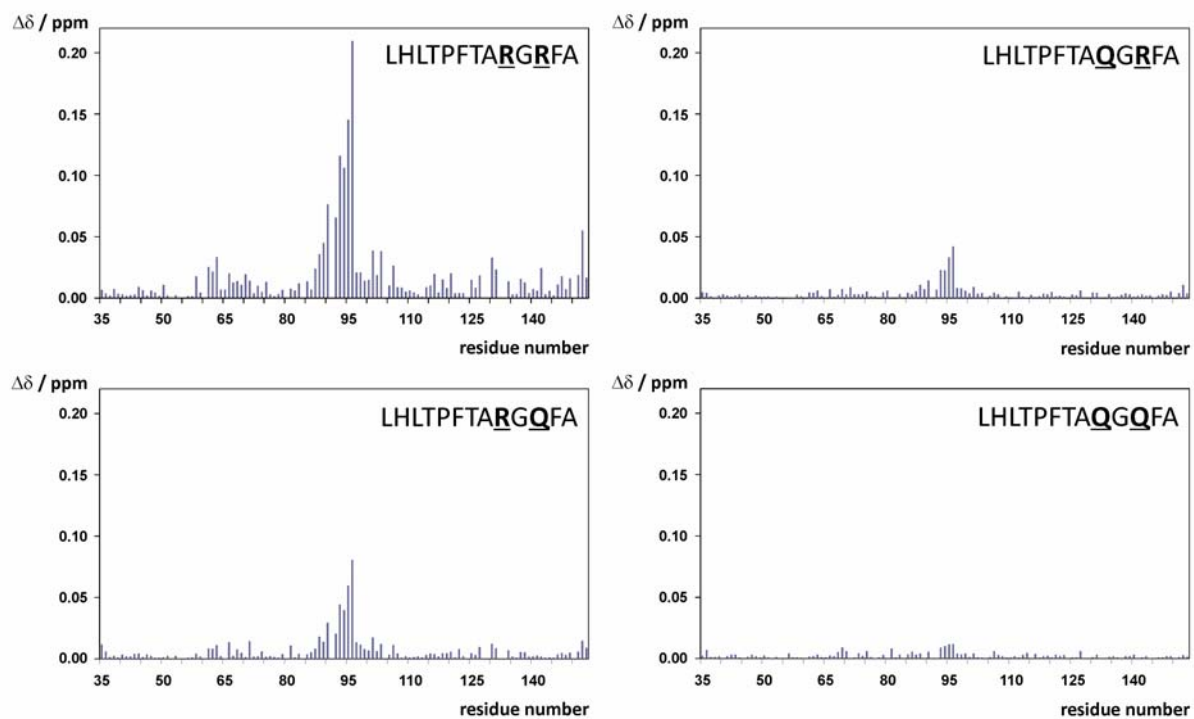

Figure S10: Section of the  $^1\text{H}/^{15}\text{N}$ -HSQC spectrum which includes the amide signals of residues T89, C93 and D94 in the  $\beta 5$ - $\alpha 1$  loop of FKBP38. Superposed are the spectra of FKBP38<sup>35-153</sup> in the absence (black contours) and presence (red contours) of Bcl-2<sup>1-211</sup>.

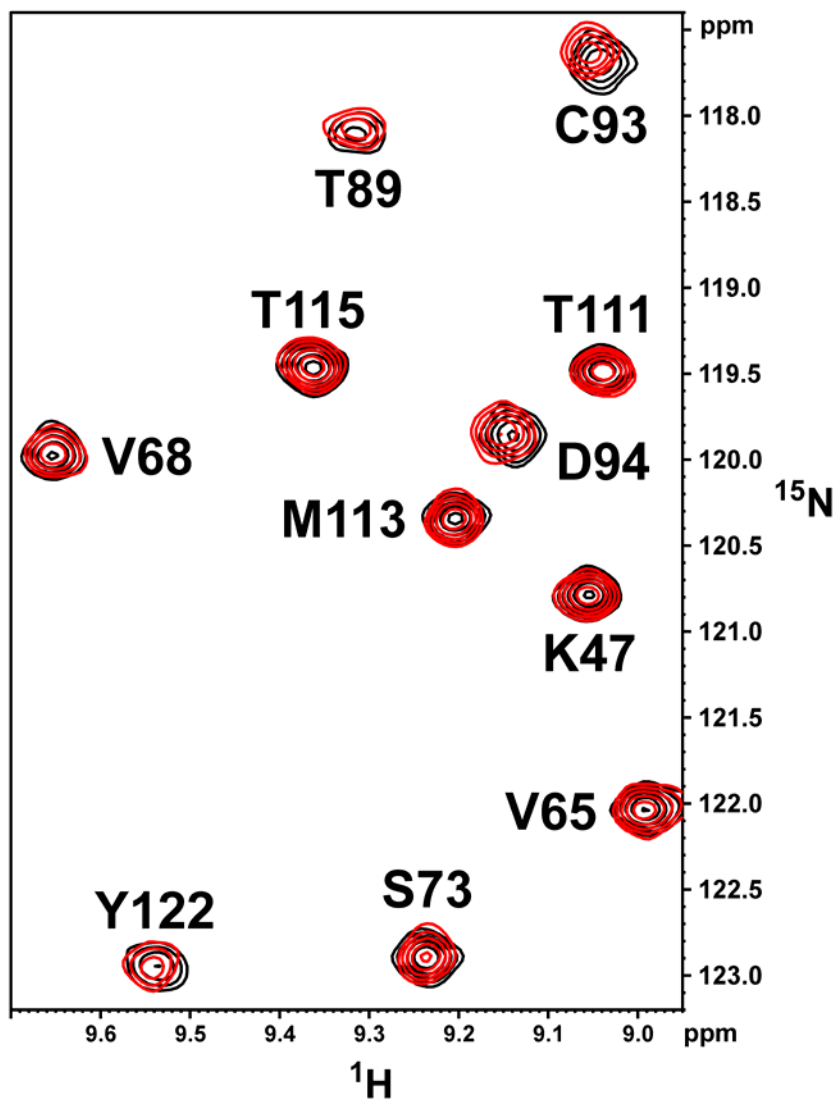

Figure S11: Graphic representation of all arginine residues (yellow sticks) in the Bcl-2 molecule (PDB ID code 1GJH). The arrow on the left marks the long flexible loop between the BH4 and BH3 domains, which is truncated in this structure (i.e. residues S51-P91 are missing).

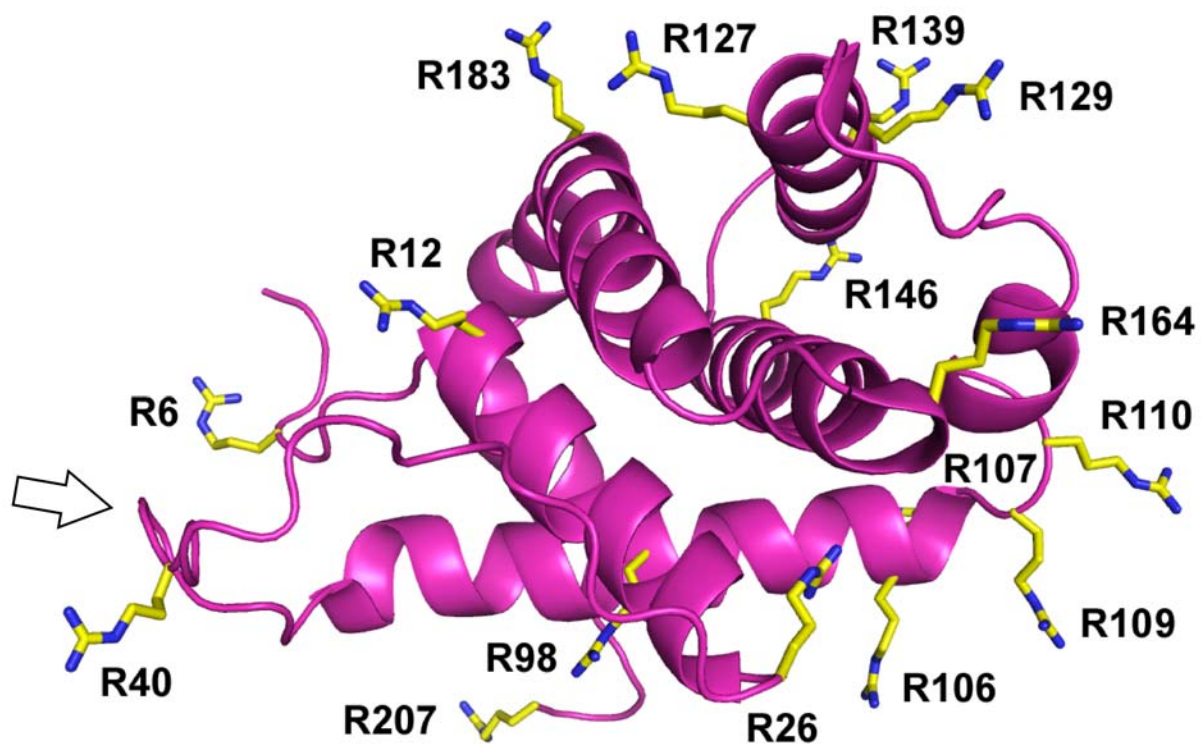

Supplement: supp_M111.317214_hauptsupplement.pdf [file supp_M111.317214_hauptsupplement.pdf]
